# Fall in implantation rates following ICSI with sperm with high DNA fragmentation

B.E. Speyer<sup>1,\*</sup>, A.R. Pizzey<sup>2</sup>, M. Ranieri<sup>3</sup>, R. Joshi<sup>3</sup>, J.D.A. Delhanty<sup>1</sup>, and P. Serhal<sup>3</sup>

<sup>1</sup>Maternal & Fetal Medicine, IFWH, University College London, 86-96 Chenies Mews, London WC1E 6HX, UK <sup>2</sup>Research Department of Haematology, University College London, London, UK <sup>3</sup>Centre for Reproductive and Genetic Health, University College Hospital, London, UK

\*Correspondence address. E-mail: barbara.smith@ucl.ac.uk

Submitted on October 20, 2009; resubmitted on March 6, 2010; accepted on April 12, 2010

**BACKGROUND:** There is considerable uncertainty as to the significance of a high sperm DNA fragmentation index (DFI) for achieving a successful pregnancy.

**METHODS:** The sperm DFI of 124 patients undergoing 192 IVF cycles and of 96 patients undergoing 155 ICSI cycles was determined using the sperm chromatin structure assay on neat sperm.

**RESULTS:** The rate of continuing pregnancies in ICSI cycles (but not in IVF cycles) showed significant negative correlation ( $r = -0.184$ ,  $P = 0.022$ ) with the DFI value. A threshold value of DFI which showed a significant difference ( $P = 0.005$ ) in rate of continuing pregnancies between higher and lower DFI levels was found for ICSI cycles to be  $\geq 19\%$ , but no such threshold was found for IVF cycles. However, if the threshold of  $\geq 30\%$  was used for IVF cycles there was a non-significant lowering of the rates of continuing pregnancy and implantation at the higher DFI levels. DFI level had no effect on fertilization rate or on the percentage of embryos having more than 4 cells at Day 3 after fertilization. A high DFI level had a marked significant effect ( $P = 0.001$ ) on implantation rate in ICSI cycles but not in IVF cycles. A significant positive correlation ( $r = 0.268$ ,  $P = 0.001$ ) between DFI and sperm midpiece defects was also noted in the ICSI patients.

**CONCLUSIONS:** These observations may help to resolve the issues about how, and to what extent, sperm DNA damage impacts upon the success of IVF and ICSI procedures.

**Key words:** DNA damage / implantation / midpiece defects / IVF/ICSI outcome / male infertility

## Introduction

A number of tests have been developed to measure the proportion of strand breaks in the DNA of mammalian spermatozoa. The sperm chromatin structure assay (SCSA; [Evenson and Jost, 1994](#); [Evenson et al., 2002](#)) measures the susceptibility of DNA to acid-induced denaturation. The method uses acridine orange (AO), which gives green fluorescence with native DNA and red fluorescence with single-stranded DNA. The proportion of red fluorescence to total fluorescence in each sperm cell is measured by flow cytometry. The percentage of cells exhibiting a high proportion of red fluorescence was originally known as COMP<sub>α</sub> (Cells Outside the Main Population), but is now represented by the DNA fragmentation index (DFI). The method is recognized as being robust and reproducible, and has been used for some years in animal husbandry and human fertility studies ([Ballachey et al., 1987](#); [Evenson et al., 1999](#)). Another

much-used method of measuring sperm DNA fragmentation is the terminal deoxynucleotidyl transferase-mediated dUTP nick-end labelling (TUNEL) assay using flow cytometry or fluorescence microscopy. The TUNEL assay identifies DNA breaks by labelling 3'OH termini and is a measure of existing DNA damage, whereas the SCSA measures single-stranded DNA after acid treatment and therefore includes potential DNA damage.

It was initially hoped that the SCSA would supplement assays in routine use in IVF clinics, such as those measuring sperm concentration, motility and morphology, and would give a reliable and independent measure of fertility. Population studies of fecundity ([Evenson et al., 1999](#); [Spano et al., 2000](#)) and of the outcomes of intrauterine insemination ([Bungum et al., 2007](#)) have shown that pregnancy outcome is inversely related to the DFI. However, the effect of raised DFI upon the outcomes of IVF and ICSI is more controversial. Several authors have observed, using SCSA ([Larson-Cook et al., 2003](#);

Virro et al., 2004; Adams et al., 2004), or using TUNEL (Henkel et al., 2003; Frydman et al., 2008) that raised DNA fragmentation predicates a significantly lower pregnancy rate from IVF and/or ICSI treatment.

However, many authors have found no significant relationship between DFI and pregnancy outcome from IVF or ICSI (Bungum et al., 2004, 2007; Gandini et al., 2004; Gardner et al., 2004; Check et al., 2005; Payne et al., 2005; Zini et al., 2005; Caglar et al., 2007; Lin et al., 2008; Nicopoullos et al., 2008). It has also emerged that pregnancies can ensue when the male has DFI levels exceeding 27–30% (Gandini et al., 2004; Check et al., 2005; Boe-Hansen et al., 2006; Lin et al., 2008). Originally 30% was proposed as a threshold level above which pregnancy was very unlikely to occur.

The lack of consistency in the findings of different investigators has resulted in considerable uncertainty as to the significance of high DFI. The importance of the problem to the counselling and treatment of infertile patients is reflected in the number of meta-analyses that have been carried out. Both Collins et al. (2008) and the Practice Committee of the American Society for Reproductive Medicine (2006) concluded that tests for DNA damage were insufficiently predictive of pregnancy outcome to justify their routine use in the evaluation of infertility. Evenson and Wixon (2006) concluded from a meta-analysis that a high DFI has less effect on the success of ICSI cycles than on IVF cycles, and suggested that high DFI patients should be directed towards ICSI in preference to IVF. The meta-analysis of Li et al. (2006) indicated that results of the TUNEL assay showed a significant effect of high DFI on pregnancy outcome for IVF but not ICSI, although the results of the SCSA assay failed to show a significant effect on either IVF or ICSI outcomes. These meta-analyses point out the need for further research (Zini and Libman, 2006; Tarozzi et al., 2007).

In the present study, we sought to establish firstly whether high DFI has any effect on pregnancy outcome, and secondly if so, at which points in the IVF or ICSI cycle the adverse effects operate.

## Materials and Methods

### Patients

The study was approved by the University College London Ethics Committee, UCLH/UCL R&D Governance and UCL Data Protection. Ninety-five patients who underwent routine semen analysis at the Centre for Reproductive and Genetic Health (CRGH) of University College London Hospital, gave written consent and later went on to have one or more IVF or ICSI cycles were recruited into the study. The semen was obtained by ejaculation. After the routine diagnostic semen analysis had been performed, a portion of the neat semen was divided into aliquots and stored at  $-80^{\circ}\text{C}$  until used for the SCSA assay, which was performed in-house.

A further group of 125 patients who had experienced one or more IVF or ICSI cycles, and whose semen had undergone an SCSA assay at the private clinic The Doctors' Laboratory between 2004 and 2009 were also included in the study. These patients had infertility linked to male factor or had experienced at least two failed cycles of assisted reproduction. For some patients, SCSA assays were performed by both clinics, with the semen collected on different days and the results were comparable ( $r = 0.844$ ,  $P < 0.001$ ,  $n = 11$ ). Therefore, the results from the two clinics are grouped together.

Patients found to have an abnormal blood karyotype were excluded from the study. All female patients were  $<45$  years of age. Only IVF and ICSI cycles are reported. Thus frozen/thawed embryo transfers and

intrauterine inseminations are excluded. Also excluded are cycles where embryos were produced but for various reasons were not transferred as fresh embryos in that cycle. A total of 347 cycles met the above criteria. Table 1 shows clinical information on the patients included in the study, together with details on their 192 IVF and 155 ICSI cycles and on their semen samples.

### IVF and ICSI procedures

The stimulation protocol was individualized after evaluation of the ovarian reserve by antral follicle count, FSH, estradiol and anti-Müllerian hormone. A long down-regulation protocol was used for patients with normal ovarian reserve. Patients with reduced reserve were stimulated with antagonist drug regimen and high starting dose of gonadotrophins. Follicular growth was monitored by ultrasound scans from Day 7 of stimulation. When at least two leading follicles reached the diameter of 18 mm hCG was administered. Ultrasound guided vaginal oocyte retrieval was performed at 37 h post-hCG injection. IVF or ICSI was performed at 40 and 41 h post-hCG, respectively. ICSI was the procedure used when semen quality was poor (e.g. low concentration and/or poor motility), when IVF had led to poor fertilization rate, and also in seven cycles of PGD needing DNA amplification where using IVF might have led to contamination. Fertilization was evaluated at 18–20 h post-insemination. Embryos were cultured in IVF medium (GIII series, Vitrolife, UK).

### Sperm chromatin structure assay

The in-house SCSA assay followed the procedure previously described elsewhere (Evenson and Jost, 1994; Evenson et al., 2002). A 100–200  $\mu\text{l}$  aliquot of frozen neat semen was rapidly thawed at  $37^{\circ}\text{C}$ , then diluted with a suitable volume (depending on the sperm concentration) of TNE buffer (150 mM NaCl, 10 mM Tris-HCl and 1.0 mM disodium EDTA, pH 7.4). A total of  $1-2 \times 10^6$  sperm cells were treated according to Evenson et al. (2002). The AO reagent used in this assay was molecular biology grade, Cat. No. A6014, Sigma-Aldrich Company Ltd, Poole, Dorset, UK. This AO was found to give the same results ( $r = 0.999$ ,  $P < 0.001$ ) as the Polysciences AO recommended by Evenson et al. (2002). Flow cytometry was performed on a Beckman-Coulter Epics Elite cytometer (High Wycombe, UK; Fig. 1). A number of samples were analysed on two other flow cytometers. The relevant populations were found to be better separated using the Beckman-Coulter instrument, which was therefore used throughout the study.

### Statistical analysis

The Statistical Package for the Social Sciences (SPSS) version 14.0 for Windows was used for Pearson correlations. Comparison of means used the Student's *t*-test for independent samples (SPSS and Excel). Statistical significance was set at  $P < 0.05$ .

## Results

As expected, male factor was the main cause of infertility in patients treated by ICSI but not in those treated by IVF ( $P < 0.001$ ). For ICSI patients, tubal disease and 'unexplained' were much less commonly named as cause of infertility ( $P < 0.001$  for both classifications). The ICSI patients also had a lower average sperm concentration, motility and normal forms than patients treated by IVF ( $P < 0.001$  for each of the three sperm properties). In the cycles, the number of 2PN embryos ( $P < 0.001$ ), morulas ( $P = 0.018$ ) and blastocysts ( $P = 0.008$ ) per treatment cycle was also lower in the patients treated by ICSI versus IVF.

**Table I** Clinical data on patients whose cycles proceeded to embryo transfer.

|                                                       | IVF treatment      | ICSI treatment     | P         |
|-------------------------------------------------------|--------------------|--------------------|-----------|
| <b>(a) Data on patients</b>                           |                    |                    |           |
| Number of patients                                    | 124                | 96                 |           |
| Average female age (years $\pm$ SD)                   | 36.4 ( $\pm$ 3.95) | 35.2 ( $\pm$ 3.85) | 0.031*    |
| Average male age (years $\pm$ SD)                     | 37.8 ( $\pm$ 5.18) | 37.8 ( $\pm$ 6.06) | NS        |
| Diagnosis                                             | % of patients      | % of patients      |           |
| Male factor                                           | 7.3                | 79.2               | <0.001*   |
| Tubal disease                                         | 20.2               | 2.1                | <0.001*   |
| Endometriosis                                         | 6.5                | 2.1                | NS        |
| Ovulatory disorder                                    | 5.6                | 1.0                | NS        |
| Polycystic ovaries                                    | 3.2                | 1.0                | NS        |
| Uterine fibroids                                      | 0                  | 1.0                | NS        |
| Unexplained                                           | 57.3               | 8.3                | <0.001*   |
| DNA amplification requiring ICSI                      | 0                  | 5.2                | In method |
| <b>(b) Data on sperm (1 semen sample per patient)</b> |                    |                    |           |
| Mean sperm concentration (million/ml)                 | 35.7               | 14.4               | <0.001*   |
| Mean percentage motility (%)                          | 57.9               | 42.3               | <0.001*   |
| Mean normal forms (%)                                 | 32.9               | 24.8               | <0.001*   |
| Patients with $> 1 \times 10^6$ /ml round cells (%)   | 15.3               | 26.0               | 0.049*    |
| Patients with $> 1 \times 10^6$ /ml leucocytes (%)    | 1.6                | 0                  | NS        |
| <b>(c) Data on cycles (1–4 cycles per patient)</b>    |                    |                    |           |
| Number of cycles                                      | 192                | 155                |           |
| Mean no. of 2PN embryos per cycle                     | 8.35               | 6.45               | <0.001*   |
| Mean no. of Day 5 morulas per cycle                   | 1.96               | 1.26               | 0.018*    |
| Mean no. of Day 5 blastocysts per cycle               | 1.12               | 0.63               | 0.008*    |
| Mean no. of embryos transferred                       | 1.97               | 1.93               | NS        |
| Implantation rate/embryo transfer (%)                 | 21.6               | 19.6               | NS        |
| Live birth events (% of cycles)                       | 25.5               | 25.2               | NS        |
| Percentage of birth events that were twin             | 26.5               | 23.1               | NS        |
| Mean duration of pregnancy (singleton) (weeks)        | 38.6               | 39.7               | NS        |
| Mean duration of pregnancy (twin) (weeks)             | 35.5               | 36.3               | NS        |
| Mean birthweight (singleton births) (g)               | 3124               | 3336               | NS        |
| Mean birthweight (twin births) (g)                    | 2280               | 2492               | NS        |

\*Significant difference: IVF versus ICSI.  
2PN, 2 pronuclei.

## Effect of DFI on pregnancy outcome

In this paper, continuing pregnancy means a pregnancy which resulted in a live birth event, unless otherwise stated. A live birth event means either a single or a multiple birth.

A simple plot of DFI against positive or negative pregnancy for each cycle produced a graph where multiple points overlapped, so the cycles (IVF and ICSI together) were arranged in order of increasing DFI, cut into groups of 28–29 cycles and mean DFI of each group was plotted against mean percentage of continuing pregnancies for that group (Fig. 2). The graph demonstrates a significant ( $P = 0.002$ ) negative correlation ( $r = -0.800$ ) between DFI and continuing pregnancy.

Table II shows Pearson correlation coefficients and significance levels for pregnancy outcomes in the 192 IVF and 155 ICSI cycles

studied. ICSI cycles showed significant correlation between DFI and continuing pregnancies and between DFI and no pregnancy, but not between DFI and miscarriages. In the case of IVF cycles there was no significant correlation between DFI and pregnancy outcome.

We examined the effect of varying the DFI threshold value on the ability of the SCSA to predict pregnancy outcome in IVF and ICSI cycles separately. Although including all the cycles for each patient gives the maximum information, an alternative is to consider only the first cycle of each patient and Table III shows both types of display. Different values of DFI were taken as proposed threshold levels and the  $P$ -value of difference between the means was calculated for each. For IVF cycles, significance was not attained for any threshold

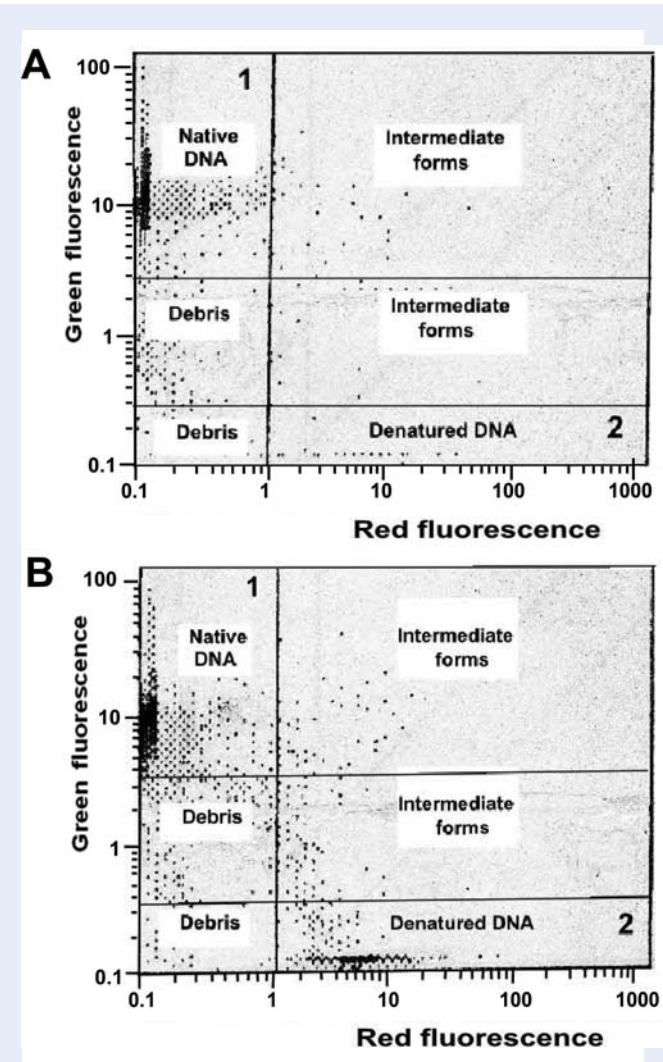

**Figure 1** Print-out from the Beckman-Coulter Epics Elite flow cytometer. The different sperm populations show good separation. The DFI was calculated as the counts in Box 2 as a percentage of the sum of the counts in Boxes 1 and 2. (A) DFI = 1%; (B) DFI = 28%.

values. For ICSI cycles, a threshold value of  $\geq 18\text{--}19\%$  showed the highest level of significance ( $P = 0.001\text{--}0.005$ ).

Table IV shows continuing pregnancy, no pregnancy and miscarriage etc. rates when the threshold values  $\geq 19\%$  and  $\geq 30\%$  are used for IVF and ICSI cycles separately. The table uses all the cycles for each patient. The threshold of  $\geq 30\%$  is included in the table because there is some indication in Table III of a minimum value of  $P$  in this region for all IVF cycles. It is seen that for ICSI cycles using the threshold  $\geq 19\%$  there are significant differences between the upper and lower DFI ranges for the rate of continuing pregnancies and the rate of non-pregnancy but not for the rate of miscarriages. For IVF cycles there is a significant difference in non-pregnancy rate between the two DFI ranges, and the continuing pregnancy rate is markedly (although non-significantly) lower in the higher DFI range. This justifies the continued use of  $\geq 30\%$  as a possible threshold level for IVF cycles.

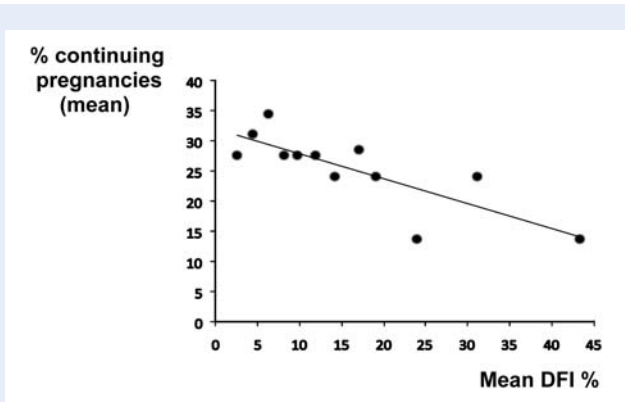

**Figure 2** The effect of DFI on the percentage of live birth events. The 347 IVF and ICSI cycles were arranged in order of increasing DFI, then split into groups of 28 or 29 cycles. The mean DFI of each group was plotted against mean percentage of live birth events. Correlation coefficient  $r = -0.800$ ;  $P = 0.002$ .

### Effect of DFI on fertilization rate and number of cells per embryo at Day 3

- (i) The fertilization rate for each treatment cycle was calculated as the number of embryos with 2PN as a percentage of the number of oocytes inseminated or injected.
- (ii) To gain an estimate of the growth of embryos between fertilization and Day 3, the number of embryos at Day 3 of the cycle having more than 4 cells per embryo was calculated as a percentage of the number of initial 2PN embryos.

The two properties were investigated by the same statistical methods. First the Pearson correlation test was performed to see if there was any correlation between the fertilization rate and DFI value or between the growth of embryos and DFI value. This was carried out for IVF cycles and ICSI cycles separately. No significant correlation was seen. Next the  $t$ -test was carried out to look for any DFI threshold value which showed a significant negative effect of higher DFI upon the fertilization or growth, but none was found. It was concluded that DFI value did not negatively affect fertilization or growth up to Day 3 after fertilization.

### Effect of DFI on percentage of morulas and blastocysts at Day 5 after fertilization

Table V shows a possible tendency for fewer blastocysts (but not morulas) in the higher DFI range, but this did not reach significance.

### Effect of DFI on implantation rate

Because of the threshold values shown in Table III of DFI  $\geq 19\%$  (for ICSI), and a tendency to a minimum  $P$  at  $\geq 30\%$  (for IVF), implantation rates for IVF and ICSI cycles for these two thresholds are given in Table VI. For IVF alone, using the DFI threshold value of  $\geq 30\%$  led to a 48% decrease in implantation rate in the higher DFI range, but this did not reach significance. For ICSI alone, using the DFI threshold value of  $\geq 19\%$  led to a highly significant difference ( $P = 0.001$ ) in implantation rate between the higher and lower DFI ranges (When the threshold was lowered to DFI  $\geq 17\%$  and  $\geq 16\%$  the significance  $P$  became less marked at 0.009 and 0.067, respectively).

**Table II** Pearson correlation coefficients (*r*) and significance levels (*P*) for DFI % against pregnancy outcome (%).

|             | Number of |        | Continuing pregnancies <sup>a</sup> |          | No pregnancy |          | Miscarriages etc. <sup>b</sup> |          |
|-------------|-----------|--------|-------------------------------------|----------|--------------|----------|--------------------------------|----------|
|             | Patients  | Cycles | <i>r</i>                            | <i>P</i> | <i>r</i>     | <i>P</i> | <i>r</i>                       | <i>P</i> |
| IVF cycles  | 124       | 192    | −0.054                              | 0.453    | 0.129        | 0.074    | −0.122                         | 0.091    |
| ICSI cycles | 96        | 155    | −0.184*                             | 0.022*   | 0.197*       | 0.014*   | −0.048                         | 0.555    |

\*Significant.

<sup>a</sup>Continuing pregnancies have all now resulted in live births apart from one at 6 months still continuing.<sup>b</sup>Miscarriages etc. comprise miscarriages, biochemical pregnancies and terminations. A positive correlation between DFI and miscarriage rate would result in a positive figure for *r* in addition to a low figure for *P*.**Table III** *P*-values of differences between the means, calculated from the data for DFI versus continuing pregnancy, taking different values of DFI as the threshold value.

| IVF cycles (all cycles)<br>( <i>n</i> = 192) |                 | IVF cycles (1 per patient)<br>( <i>n</i> = 124) |                 | ICSI cycles (all cycles)<br>( <i>n</i> = 155) |                 | ICSI cycles (1 per patient)<br>( <i>n</i> = 96) |                 |
|----------------------------------------------|-----------------|-------------------------------------------------|-----------------|-----------------------------------------------|-----------------|-------------------------------------------------|-----------------|
| Threshold DFI %                              | <i>P</i> -value | Threshold DFI %                                 | <i>P</i> -value | Threshold DFI %                               | <i>P</i> -value | Threshold DFI %                                 | <i>P</i> -value |
| ≥44                                          | 0.615           | ≥44                                             | 0.765           | ≥31                                           | 0.633           | ≥31                                             | 0.575           |
| ≥38                                          | 0.250           | ≥38                                             | 0.970           | ≥30                                           | 0.490           | ≥30                                             | 0.420           |
| ≥37                                          | 0.568           | ≥37                                             | 0.463           | ≥27                                           | 0.319           | ≥27                                             | 0.298           |
| ≥33                                          | 0.262           | ≥33                                             | 0.865           | ≥25                                           | 0.086           | ≥25                                             | 0.070           |
| ≥32                                          | 0.214           | ≥32                                             | 0.957           | ≥23                                           | 0.038           | ≥23                                             | 0.043           |
| ≥31                                          | 0.214           | ≥31                                             | 0.957           | ≥21                                           | 0.022           | ≥21                                             | 0.030           |
| ≥30                                          | 0.214           | ≥30                                             | 0.957           | ≥20                                           | 0.013           | ≥20                                             | 0.022           |
| ≥27                                          | 0.474           | ≥27                                             | 0.665           | → ≥19                                         | 0.005           | ≥19                                             | 0.006           |
| ≥24                                          | 0.853           | ≥24                                             | 0.947           | ≥18                                           | 0.005           | → ≥18                                           | 0.001           |
| ≥20                                          | 0.520           | ≥20                                             | 0.587           | ≥17                                           | 0.027           | ≥17                                             | 0.007           |
| ≥19                                          | 0.801           | ≥19                                             | 0.838           | ≥16                                           | 0.109           | ≥16                                             | 0.052           |
| ≥14                                          | 0.640           | ≥14                                             | 0.988           | ≥14                                           | 0.050           | ≥14                                             | 0.006           |
| ≥8                                           | 0.714           | ≥8                                              | 0.798           | ≥8                                            | 0.111           | ≥8                                              | 0.041           |

Arrows (→) indicate DFI values which show a relatively high level of significance and are therefore suitable as threshold values.

This result indicates that the sperm used for ICSI having a DFI ≥ 19% was associated with a lower implantation rate than the sperm used for ICSI having a DFI < 19%.

### Comparison of clinical details above and below DFI threshold levels

To further investigate the effect of DFI upon implantation rate, clinical details of patients were compared above and below threshold levels (Table VII). In ICSI cycles the average age above and below the threshold level was similar. The percentage of male factor infertility was also similar, which is explained by this being the predominant reason for choosing ICSI treatment. Of the sperm properties, the percentage of normal forms was significantly different in the ICSI cycles, and the total motility, i.e. the percentage of sperm counted as motile, was significantly different above and below threshold values in both IVF and ICSI cycles.

Table VIII shows a further study of these properties by Pearson correlation. This statistical method has the advantage that no assumptions with regard to threshold levels need be made. The third section of the table includes all the patients for whom the DFI value was known, whether or not they proceeded to IVF or ICSI treatment. With this larger number of patients a strong correlation of DFI with male age, sperm concentration and total motility is seen, and a less strong but still significant correlation with normal forms. It was of interest to know what part of the sperm morphology (seen by light microscopy) was most affected by high DFI. The only evidence seen was a very strong correlation between DFI and midpiece defects in ICSI cycles, but this was not seen in IVF cycles or in the larger group of patients. Using comparison of means the effect in ICSI cycles was most significant around DFI ≥ 34%. No significant correlation between DFI and head or tail defects was seen in any of the patient groups.



**Table IV** Comparison of reproductive outcomes for patients using DFI threshold values  $\leq 19$  and  $\leq 30\%$ .

| IVF cycles      |            |                  |          |                                |       | ICSI cycles  |            |                  |          |                                |  |
|-----------------|------------|------------------|----------|--------------------------------|-------|--------------|------------|------------------|----------|--------------------------------|--|
| Patients (n)    | Cycles (n) | Continuing preg. | No preg. | Miscarriages etc. <sup>a</sup> |       | Patients (n) | Cycles (n) | Continuing preg. | No preg. | Miscarriages etc. <sup>a</sup> |  |
| DFI $\geq 19\%$ | 18         | 33               | 27.3     | 69.7                           | 3.0   | 44           | 74         | 14.9             | 75.7     | 9.5                            |  |
| DFI $< 19\%$    | 106        | 159              | 25.2     | 61.6                           | 13.2  | 52           | 81         | 34.6             | 55.6     | 9.9                            |  |
| P               |            |                  | 0.801    | 0.422                          | 0.096 |              |            | 0.005*           | 0.008*   | 0.931                          |  |
| DFI $\geq 30\%$ | 8          | 16               | 12.5     | 87.5                           | 0.0   | 22           | 34         | 20.6             | 70.6     | 8.8                            |  |
| DFI $< 30\%$    | 116        | 176              | 26.7     | 60.8                           | 12.5  | 74           | 121        | 26.4             | 63.6     | 9.9                            |  |
| P               |            |                  | 0.214    | 0.038*                         | 0.134 |              |            | 0.490            | 0.455    | 0.850                          |  |

The figures are % of cycles.  
\*Significant.  
<sup>a</sup>Miscarriages etc. comprised pregnancies failing to result in live birth for any reason. A biochemical pregnancy was defined as  $\beta$ -HCG  $> 50$  IU/ml but no fetal heart seen. In IVF cycles there were 10 biochemical pregnancies, 10 miscarriages, 1 medical termination and 1 ectopic pregnancy, all occurring with DFI  $< 30$ . In ICSI cycles there were 11 biochemical pregnancies (5 with DFI  $\geq 19\%$ ), 2 miscarriages (1 with DFI  $\geq 19\%$ ), 1 ectopic pregnancy (DFI = 16) and 1 medical termination (DFI = 21).

Discussion

The investigation reported here was carried out in a clinical setting, and therefore the group of patients having ICSI cycles differed from the group having IVF cycles in that the infertility the ICSI group was experiencing was predominantly associated with male factors. One aim of this study was to discover whether couples where the male has a high DFI have a significantly lower rate of continuing pregnancies in IVF and ICSI cycles than couples with a lower DFI. The statistical evidence shown in Tables II–IV supports this for ICSI cycles. The evidence for the IVF cycles was less strong, showing a non-significant trend towards lower continuing pregnancy and implantation rates at DFI levels  $\geq 30\%$ . The IVF cycles had a lower percentage of male factor infertility and a lower proportion of high DFI patients than the ICSI cycles (Tables I and IV). The greater effect of high DFI upon ICSI cycles compared with IVF cycles is supported by Benchaib et al. (2003) who found a lack of correlation between pregnancy rate and DFI in 50 IVF patients, whereas there was a correlation  $P < 0.05$  with ICSI in 54 patients. Bakos et al. (2007) found a significant negative correlation ( $P < 0.05$ ) between DFI and pregnancy outcome in 68 ICSI couples but not in 45 IVF couples. Borini et al. (2006) found a negative correlation ( $P = 0.007$ ) between DFI and pregnancy rate in 50 ICSI patients, whereas in 82 IVF patients the correlation was non-significant ( $P = 0.723$ ). However, Henkel et al. (2003) and Frydman et al. (2008) report a significant negative correlation in IVF cases between DFI and pregnancy rate.

In this type of study it is usual to choose a threshold level and to compare results above and below the threshold. Table III indicates that the threshold level for ICSI cycles in this study occurred at a markedly lower DFI level than that proposed (and commonly accepted) for IVF cycles using the SCSA method. This would explain the finding in the meta-analysis of Li et al. (2006) that, using SCSA, sperm DNA damage has no adverse effect on clinical pregnancy in either IVF or ICSI cycles. The three papers cited in the meta-analysis use different study designs, but the simplified account given in the meta-analysis states that Bungum et al. (2004) and Boe-Hansen et al. (2006) used a DFI cut-off value of 27% whereas Zini et al. (2005) used one of 30%. Neither of these values would have given a significant difference in continuing pregnancy rate for ICSI cycles in the present study since they lie well above the threshold of  $\geq 19\%$  used by us for these cycles.

The lower DFI threshold for ICSI cycles compared with IVF cycles indicates that the ICSI cycles (with their higher proportion of male factor infertility) are more sensitive to the harmful effects of DNA fragmentation, since the adverse effect on pregnancy rate occurs at a lower DFI level.

It is often stated that high DFI levels are associated with an increase in miscarriage rates: the present study found no evidence of an increase.

The next aim of the study was to investigate at which stage in the cycle the adverse effect of high DFI operates. When fertilization rates and number of cells per embryo at Day 3 after fertilization were examined, no effect of high DFI was seen. During the period up to Day 3 the embryo is considered to rely on maternal transcripts for its metabolism and growth (Tesarik et al., 1986; Braude et al., 1988). At Day 5, when the embryonic genome is participating in the metabolism of the embryo, there was a reduction in the number of blastocysts when DFI was in the upper range, but this did not reach levels of significance. Similarly Benchaib et al. (2003) and Seli et al.

**Table V** Percentages of embryos present as morulas and blastocysts at Day 5 after fertilization for patients using threshold DFI values  $\geq 19$  and  $\geq 30\%$ .

|                 | IVF cycles   |            |             |                 | ICSI cycles  |            |             |                 |       |
|-----------------|--------------|------------|-------------|-----------------|--------------|------------|-------------|-----------------|-------|
|                 | Patients (n) | Cycles (n) | Morulas (%) | Blastocysts (%) | Patients (n) | Cycles (n) | Morulas (%) | Blastocysts (%) |       |
| DFI $\geq 19\%$ | 18           | 33         | 15.9        | 9.1             | 44           | 74         | 13.7        | 6.2             | 0.156 |
| DFI $< 19\%$    | 106          | 159        | 18.8        | 11.2            | 52           | 81         | 17.3        | 10.0            |       |
| P               |              |            | 0.504       | 0.500           |              |            |             | 0.358           |       |
| DFI $\geq 30\%$ | 8            | 16         | 17.9        | 9.3             | 22           | 34         | 17.0        | 5.9             |       |
| DFI $< 30\%$    | 116          | 176        | 18.4        | 11.0            | 74           | 121        | 15.1        | 8.8             |       |
| P               |              |            | 0.938       | 0.704           |              |            | 0.697       | 0.369           |       |

The values were calculated as the percentage of the original 2PN embryos which at Day 5 were present as morulas or blastocysts. They were calculated for each cycle, then those for each DFI range were averaged.

**Table VI** Implantation rates.

|                 | IVF cycles   |            |             |                       | ICSI cycles  |            |             |                       |        |
|-----------------|--------------|------------|-------------|-----------------------|--------------|------------|-------------|-----------------------|--------|
|                 | Patients (n) | Cycles (n) | Embryos (n) | Implantation rate (%) | Patients (n) | Cycles (n) | Embryos (n) | Implantation rate (%) |        |
| DFI $\geq 19\%$ | 17           | 32         | 68          | 22.1                  | 44           | 74         | 149         | 12.1                  | 0.001* |
| DFI $< 19\%$    | 104          | 157        | 311         | 21.5                  | 51           | 80         | 147         | 27.2                  |        |
| P               |              |            |             | 0.926                 |              |            |             |                       |        |
| DFI $\geq 30\%$ | 8            | 16         | 34          | 11.8                  | 22           | 34         | 70          | 17.2                  |        |
| DFI $< 30\%$    | 113          | 173        | 345         | 22.6                  | 73           | 120        | 226         | 20.4                  |        |
| P               |              |            |             | 0.144                 |              |            |             | 0.556                 |        |

Each transferred embryo that resulted in a fetal heart was expressed as 100%, and each that did not was expressed as 0%. These figures were then averaged for each DFI range. Four cycles produced no embryos and are omitted.

\*Significance.

(2004) have observed a lowering of blastocyst formation with high DFI which did not reach significance. Virro *et al.* (2004) have reported a significant negative effect on the formation of blastocysts.

In ICSI cycles a very marked negative effect of high DFI upon implantation rate was observed, and in view of the lack of significant effect at previous stages this can be regarded as accounting for most of the adverse effect of high DFI upon continuing pregnancy rates. An effect on implantation has also been observed by Adams *et al.* (2004), Tesarik *et al.* (2004; Tesarik, 2005) and Frydman *et al.* (2008), and is termed the 'late paternal effect' by Tesarik *et al.* to distinguish it from other effects that occur earlier in the cycle and do not depend on DNA fragmentation.

The studies by previous workers reported above, supported by the present study, indicate clearly that strand breaks in the sperm DNA have little or no effect on fertilization and early embryo growth but begin to have an effect at the stage of blastocyst development, and then have a very marked effect on implantation of the embryo. There is also support from two studies in which sperm DNA was damaged by gamma irradiation and subsequently used in fertility studies (Ahmadi and Ng, 1999; Fatehi *et al.*, 2006). There was no significant effect on fertilization rate or early cleavage, but the effects on blastocyst development and implantation rate were very marked.

The inverse relationship between DFI and sperm motility is well-established (Sun *et al.*, 1997; Zini *et al.*, 2001; Benchaib *et al.*, 2003). This may contribute to the relative lack of significant negative correlation between high DFI and continuing pregnancy in IVF cycles compared with ICSI cycles. The spermatozoa with high DFI may lack certain properties required for IVF of an egg, the most obvious of which is motility, and in IVF cycles they will be less able to compete against any spermatozoa present in the same sample which possess relatively normal characteristics, resulting in a more normal spermatozoon fertilizing the egg. When doing ICSI, embryologists try to pick out the best spermatozoa, but some types of damage may not be seen. If better ways of selecting spermatozoa for ICSI, such as high magnification inspection of morphology (Bartoov *et al.*, 2002) can be developed further, the disadvantage of ICSI in this respect may be lessened.

There was a very strong positive correlation between DFI and sperm midpiece defects in the sperm used for ICSI cycles. Midpiece defects were counted under the optical microscope as part of the routine sperm analysis and details of the defects were not recorded. They may, however, be related to the midpiece defects described by Said *et al.* (2005) which were found in the lighter fractions resulting from density gradient separation of semen from teratozoospermic

**Table VII** Comparison of certain parameters at DFI values above and below threshold values for all IVF and ICSI cycles.

|                                            | IVF cycles          |                      |                    | ICSI cycles         |                     |                    |
|--------------------------------------------|---------------------|----------------------|--------------------|---------------------|---------------------|--------------------|
|                                            | DFI ≥ 30,<br>n = 16 | DFI < 30,<br>n = 176 | Significance,<br>P | DFI ≥ 19,<br>n = 74 | DFI < 19,<br>n = 81 | Significance,<br>P |
| Mean female age (years)                    | 37.4, n = 16        | 36.5, n = 176        | NS                 | 35.6, n = 74        | 35.8, n = 81        | NS                 |
| Mean male age (years)                      | 42.6, n = 16        | 37.8, n = 176        | 0.001              | 38.9, n = 74        | 38.6, n = 81        | NS                 |
| % of patients with male factor infertility | 12.5, n = 16        | 6.3, n = 176         | NS                 | 81.1, n = 74        | 79.0, n = 81        | NS                 |
| Sperm concentration (M/ml)                 | 41.2, n = 16        | 35.9, n = 176        | NS                 | 11.7, n = 74        | 15.2, n = 81        | NS                 |
| Sperm total motility (%)                   | 51.9, n = 16        | 59.6, n = 176        | 0.036              | 39.1, n = 74        | 45.3, n = 81        | 0.026              |
| Sperm normal forms (%)                     | 35.1, n = 16        | 33.1, n = 176        | NS                 | 22.4, n = 70        | 27.6, n = 77        | 0.003              |

Some values for normal forms were not available.

**Table VIII** Pearson correlations of sperm parameters against DFI values for all IVF and ICSI cycles.

|                      | IVF cycles |         |         | ICSI cycles |         |        | All patients |         |         |
|----------------------|------------|---------|---------|-------------|---------|--------|--------------|---------|---------|
|                      | n          | r       | P       | n           | r       | P      | n            | r       | P       |
| Male age (years)     | 192        | 0.270*  | <0.001* | 155         | 0.120   | 0.136  | 350          | 0.167*  | 0.002*  |
| Concentration (M/ml) | 192        | 0.056   | 0.439   | 155         | −0.107  | 0.186  | 350          | −0.219* | <0.001* |
| Total motility (%)   | 192        | −0.241* | 0.001*  | 155         | −0.238* | 0.003* | 350          | −0.391* | <0.001* |
| Normal forms (%)     | 192        | 0.092   | 0.206   | 147         | −0.160  | 0.053  | 338          | −0.124* | 0.023*  |
| Head defects (%)     | 191        | 0.078   | 0.284   | 144         | −0.139  | 0.097  | 331          | 0.097   | 0.607   |
| Midpiece defects (%) | 191        | −0.130  | 0.072   | 144         | 0.268*  | 0.001* | 331          | 0.092   | 0.094   |
| Tail defects (%)     | 191        | −0.071  | 0.330   | 144         | −0.016  | 0.845  | 331          | 0.012   | 0.833   |

The third section represents one sample from each of 350 patients (except where indicated) including those for IVF and ICSI treatment and also those patients not having either treatment. Some values for morphology were not available.

\*Significant.

patients. These lighter fractions contained more DNA strand breaks (measured by TUNEL) than the denser semen fractions and were active in generating reactive oxygen species. The midpiece defects in these fractions are considered to result from disordered spermiogenesis leading to enzyme-containing residual cytoplasm in the midpiece (Saleh and Agarwal, 2002). Midpiece defects of this type have aroused recent interest because of their possible role in initiating sperm DNA fragmentation (Aitken and De Iullis, 2010). On a practical note, it appears from our results that a finding of low motility combined with raised midpiece defects in a routine sperm analysis should lead one to suspect a high level of DNA fragmentation.

If the nuclear DNA in the spermatozoon used for ICSI is fragmented it is understandable that the complex process of implantation into the uterus is impaired, causing a lowering of the rate of continuing pregnancies in ICSI cycles when the DFI is ≥ 19%. In our unit, despite many severe cases of male factor infertility in the ICSI group, the average rate of continuing pregnancies for ICSI was the same as for IVF (Tables I and IV), and in the cycles with DFI ≥ 19% there were 11 live birth events resulting in 15 healthy children. Although the usefulness of ICSI remains beyond question, there is some concern that there may be long-term effects on offspring of using high DFI spermatozoa (Aitken and De Iullis, 2007). As long as this remains a possibility every

effort should be made to find ways of lowering the DFI, such as by treatment with oral antioxidants (Greco et al., 2005).

## References

Adams C, Anderson L, Wood S. High, but not moderate, levels of sperm DNA fragmentation are predictive of poor outcome in egg donation cycles. *Fertil Steril* 2004;**82**(Suppl. 2):S44.

Ahmadi A, Ng S. Fertilizing ability of DNA-damaged spermatozoa. *J Exp Zool* 1999;**284**:696–704.

Aitken RJ, De Iullis GN. Origins and consequences of DNA damage in male germ cells. *Reprod Biomed Online* 2007;**14**:727–733.

Aitken RJ, De Iullis GN. On the possible origins of DNA damage in human spermatozoa. *Mol Hum Reprod* 2010;**16**:3–13.

Bakos HW, Thompson JG, Feil D, Lane M. Sperm DNA damage is associated with assisted reproductive technology pregnancy. *Int J Androl* 2007;**31**:518–526.

Ballachey BE, Hohenboken WD, Evenson DP. Heterogeneity of sperm nuclear chromatin structure and its relationship to bull fertility. *Biol Reprod* 1987;**36**:915–925.

Bartoov B, Berkovitz A, Eltes F, Kogosowski A, Menezo Y, Barak Y. Real-time fine morphology of motile human sperm cells is associated with IVF–ICSI outcome. *J Androl* 2002;**23**:1–8.



- Benchaib M, Braun V, Lornage J, Hadj S, Salle B, Lejeune H, Guerin JF. Sperm DNA fragmentation decreases the pregnancy rate in an assisted reproductive technique. *Hum Reprod* 2003;**18**:1023–1028.
- Boe-Hansen GB, Fedder J, Ersboll AK, Christensen P. The sperm chromatin structure assay as a diagnostic tool in the human fertility clinic. *Hum Reprod* 2006;**21**:1576–1582.
- Borini A, Tarozzi N, Bizzaro D, Bonu MA, Fava L, Flamigni C, Coticchio G. Sperm DNA fragmentation: paternal effect on early post-implantation embryo development in ART. *Hum Reprod* 2006;**21**:2876–2881.
- Braude P, Bolton V, Moore S. Human gene expression first occurs between the four- and eight-cell stages of preimplantation development. *Nature* 1988;**332**:459–461.
- Bungum M, Humaidan P, Spano M, Jepson K, Bungum L, Giwercman A. The predictive value of sperm chromatin structure assay (SCSA) parameters for the outcome of intrauterine insemination, IVF and ICSI. *Hum Reprod* 2004;**19**:1401–1408.
- Bungum M, Humaidan P, Axmon A, Spano M, Bungum L, Erenpreiss J, Giwercman A. Sperm DNA integrity assessment in prediction of assisted reproduction technology outcome. *Hum Reprod* 2007;**22**:174–179.
- Caglar GS, Koster F, Schopper B, Asimakopoulos B, Nehls B, Nikolettos N, Diedrich K, Al-Hasani S. Semen DNA fragmentation index, evaluated with both TUNEL and Comet assay, and the ICSI outcome. *In Vivo* 2007;**21**:1075–1080.
- Check JH, Graziano V, Cohen R, Krotec J, Check ML. Effect of an abnormal sperm chromatin structural assay (SCSA) on pregnancy outcome following (IVF) with ICSI in previous IVF failures. *Arch Androl* 2005;**51**:121–124.
- Collins JA, Barnhart KT, Schlegel PN. Do sperm DNA integrity tests predict pregnancy with in vitro fertilization? *Fertil Steril* 2008;**89**:823–831.
- Evenson D, Jost L. Sperm chromatin structure assay: DNA denaturability. *Methods Cell Biol* 1994;**42**:159–176.
- Evenson D, Wixon R. Meta-analysis of sperm DNA fragmentation using the sperm chromatin structure assay. *Reprod Biomed Online* 2006;**12**:466–472.
- Evenson DP, Jost LK, Marshall D, Zinaman MJ, Clegg E, Purvis K, De Angelis P, Claussen OP. Utility of the sperm chromatin structure assay as a diagnostic and prognostic tool in the human fertility clinic. *Hum Reprod* 1999;**14**:1039–1049.
- Evenson DP, Larson KL, Jost LK. Sperm chromatin structure assay: its clinical use for detecting sperm DNA fragmentation in male infertility and comparisons with other techniques. *J Androl* 2002;**23**:25–43.
- Fatehi AN, Bevers MM, Schoevers E, Roelen BAJ, Colenbrander B, Gadella BM. DNA damage in bovine sperm does not block fertilization and early embryonic development but induces apoptosis after the first cleavages. *J Androl* 2006;**27**:176–188.
- Frydman N, Prisant N, Hesters L, Frydman R, Tachdjian G, Cohen-Bacrie P, Fanchin R. Adequate ovarian follicular status does not prevent the decrease in pregnancy rates associated with high sperm DNA fragmentation. *Fertil Steril* 2008;**89**:92–97.
- Gandini L, Lombardo F, Paoli D, Caruso F, Eleuteri P, Leter G, Ciriminna R, Culasso F, Dondero F, Lenzi A et al. Full-term pregnancies achieved with ICSI despite high levels of sperm chromatin damage. *Hum Reprod* 2004;**19**:1409–1417.
- Gardner DK, Schoolcraft WB, Surrey ES, Stille K, Stevens J, Evenson D. The sperm chromatin structure assay (SCSA) and its relationship to IVF outcome: a prospective trial. *Fertil Steril* 2004;**82**(Suppl. 2):S192.
- Greco E, Romano S, Iacobelli M, Ferrero S, Baroni E, Minasi MG, Ubaldi F, Rienzi L, Tesarik J. ICSI in cases of sperm DNA damage: beneficial effect of oral antioxidant treatment. *Hum Reprod* 2005;**20**:2590–2594.
- Henkel R, Kierspel E, Hajimohammad M, Stalf T, Hoogendijk C, Mehnert C, Menkveld R, Schill W, Kruger TF. DNA fragmentation of spermatozoa and assisted reproduction technology. *Reprod Biomed Online* 2003;**7**:477–484.
- Larson-Cook KL, Brannan JD, Hansen KA, Kasperson KM, Aamold BS, Evenson DP. Relationship between the outcomes of assisted reproductive techniques and sperm DNA fragmentation as measured by the sperm chromatin structure assay. *Fertil Steril* 2003;**80**:895–902.
- Li Z, Wang L, Cai J, Huang H. Correlation of sperm DNA damage with IVF and ICSI outcomes: a systematic review and meta-analysis. *J Assist Reprod Genet* 2006;**23**:367–376.
- Lin M, Lee RK, Li S, Lu C, Sun F, Hwu Y. Sperm chromatin structure assay parameters are not related to fertilization rates, embryo quality, and pregnancy rates in in vitro fertilization and intracytoplasmic sperm injection, but might be related to spontaneous abortion rates. *Fertil Steril* 2008;**90**:352–359.
- Nicopoulos JDM, Gilling-Smith C, Almeida PA, Homa S, Norman-Taylor JQ, Ramsay JWA. Sperm DNA fragmentation in subfertile men: the effect on the outcome of intracytoplasmic sperm injection and correlation with sperm variables. *BJU Int* 2008;**101**:1553–1560.
- Payne JF, Raburn DJ, Couchman GM, Price TM, Jamison MG, Walmer DK. Redefining the relationship between sperm deoxyribonucleic acid fragmentation as measured by the sperm chromatin structure assay and outcomes of assisted reproductive techniques. *Fertil Steril* 2005;**84**:356–364.
- Practice Committee of the American Society for Reproductive Medicine. *Fertil Steril* 2006;**86**(Suppl. 4):S35–S37.
- Said TM, Agarwal A, Sharma RK, Thomas AJ Jr, Sikka SC. Impact of sperm morphology on DNA damage caused by oxidative stress induced by  $\beta$ -nicotinamide adenine dinucleotide phosphate. *Fertil Steril* 2005;**83**:95–103.
- Saleh RA, Agarwal A. Oxidative stress and male infertility: from research bench to clinical practice. *J Androl* 2002;**23**:737–752.
- Seli E, Gardner DK, Schoolcraft WB, Moffatt O, Sakkas D. Extent of nuclear DNA damage in ejaculated spermatozoa impacts on blastocyst development after in vitro fertilization. *Fertil Steril* 2004;**82**:378–383.
- Spano M, Bonde JP, Hjollund HI, Kolstad HA, Cordelli E, Leter G. Sperm chromatin damage impairs human fertility. The Danish first pregnancy planner study team. *Fertil Steril* 2000;**73**:43–50.
- Sun J, Jurisicova A, Casper RF. Detection of deoxyribonucleic acid fragmentation in human sperm: correlation with fertilization in vitro. *Biol Reprod* 1997;**56**:602–607.
- Tarozzi N, Bizzaro D, Flamigni C, Borini A. Clinical relevance of sperm DNA damage in assisted reproduction. *Reprod Biomed Online* 2007;**14**:746–757.
- Tesarik J. Paternal effects on cell division in the human preimplantation embryo. *Reprod Biomed Online* 2005;**10**:370–375.
- Tesarik J, Kopečný V, Plachot M, Mandelbaum J, Da Lage C, Flechon J. Nucleogenesis in the human embryo developing in vitro: ultrastructural and autoradiographic analysis. *Dev Biol* 1986;**115**:193–203.
- Tesarik J, Greco E, Mendoza C. Late, but not early, paternal effect on human embryo development is related to sperm DNA fragmentation. *Hum Reprod* 2004;**19**:611–615.

- Virro MR, Larson-Cook KL, Evenson DP. Sperm chromatin structure assay (SCSA) parameters are related to fertilization, blastocyst development, and ongoing pregnancy in in vitro fertilization and intracytoplasmic sperm injection cycles. *Fertil Steril* 2004;**81**:1289–1295.
- Zini A, Libman J. Sperm DNA damage: clinical significance in the era of assisted reproduction. *CMAJ* 2006;**175**:495–500.
- Zini A, Bielecki R, Phang D, Zenzes MT. Correlations between two markers of sperm DNA integrity, DNA denaturation and DNA fragmentation, in fertile and infertile men. *Fertil Steril* 2001;**75**:674–677.
- Zini A, Meriano J, Kader K, Jarvi K, Laskin CA, Cadesky K. Potential adverse effect of sperm DNA damage on embryo quality after ICSI. *Hum Reprod* 2005;**20**:3476–3480.
